# Supplementary material for: Familiarity and Knowledge regarding Molar Incisor Hypomineralization amongst a group of Egyptian Dentists and Dental Students
Source: Research Square preprint supplement (doi:10.21203/rs.3.rs-7565506/v1), 2025-09-26
Supplement: Supplementary file 1 [file 7c72332d22d60e93887ba607.pdf]

# KNOWLEDGE AND ATTITUDE REGARDING MOLAR INCISOR HYPOMINERALIZATION AMONGST EGYPTIAN DENTISTS

Dear colleagues:

You are invited to participate in a survey as a part of research assessing the knowledge, perception, and attitude regarding Molar Incisor Hypomineralization. The survey consists of 34 questions. It will take approximately 3 minutes to complete the survey. Your responses are recorded anonymously.

*Abbreviations:*

**MIH**: Molar Incisor Hypomineralization, **FPM**: First Permanent Molar

Thank you for your participation

\* Required

## Socio-demographic background and practice profile

1

**Your gender \***

☐ male

☐ female

2

**Your age group \***

☐ <30 yrs

☐ 31-40 yrs

☐ 41-50 yrs

☐ 51-60 yrs

☐ >60 yrs

3

**Which University have you graduated from? \***

☐ Public

☐ Private

4

**Are you a General practitioner or a Specialist ? \***

- ☐ General practitioner
- ☐ Specialist

5

**If You are a specialist**

(please specify your specialty):

- ☐ Paediatric Dentistry
- ☐ Endodontics
- ☐ Orthodontics
- ☐ Restorative Dentistry
- ☐ Periodontology
- ☐ Prosthodontic
- ☐ Oral and Maxillofacial Surgery

6

**Did you obtain any additional qualification which is relevant to the dental profession?\*****If yes, please specify your qualification** (Multiple answers are possible). \*

- ☐ Post-graduate Diploma
- ☐ Master's degree
- ☐ Doctoral degree
- ☐ Fellowship
- ☐ Membership

7

**How many years have you been practicing? \***

- ☐ Less than 5 years
- ☐ 5 to 10 years
- ☐ 11 to 20 years
- ☐ 21 to 30 years
- ☐ More than 30 years

8

**Where do you practice? (Multiple answers are possible) \***

- ☐ Private Sector
- ☐ Public Sector
- ☐ University Setting

### Awareness, Knowledge and perception

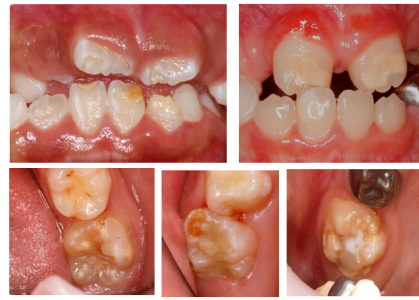

9

**Are you familiar with MIH? \***

☐ Yes

☐ No

10

**If yes, how did you learn about it? (Multiple answers are possible).**

☐ Undergraduate curricula

☐ Postgraduate curricula

☐ Both undergraduate and postgraduate curricula

☐ From a colleague

☐ From published research

11

**Do you know the clinical characteristics of MIH? \***

☐ Yes

☐ No

12

**Have you been aware that MIH is a developmental defect that differs from fluorosis and hypoplasia? \***

☐ Yes

☐ No

13

1. **In your best judgment, how prevalent is MIH in your community?** (One answer is possible).

\*

- ☐ <5 %
- ☐ 5-10%
- ☐ >20 %
- ☐ Not sure

14

**Which factors do you think are involved in the etiology of MIH?** (Multiple answers are possible).

\*

- ☐ Genetic factors
- ☐ Environmental contaminants
- ☐ Acute medical conditions affecting the mother or her child.
- ☐ Chronic medical conditions affecting the mother or her child.
- ☐ Antibiotics or medications
- ☐ Fluoride exposure

15

**When do you think this insult most likely happened?** (One answer is possible) \*

- ☐ During pregnancy
- ☐ 1st year of life
- ☐ 3rd year of life
- ☐ Pregnancy to 1st year of life
- ☐ Pregnancy to 3rd year of life

16

**Do you think that the pattern of caries related to MIH is different from the classical caries pattern? \***

- ☐ Yes
- ☐ No
- ☐ Not sure

**Perception, clinical experience, continuing education**

17

**Do you encounter teeth with MIH in your practice? \***☐ Yes☐ No

18

**How often do you notice MIH-affected teeth in the clinic? \***☐ Daily basis☐ Weekly basis☐ Monthly basis☐ Yearly basis

19

**As a clinician, do you feel prepared enough to diagnose a patient with MIH? \***☐ Yes, in the initial and advanced stages.☐ Yes, only in the initial stages.☐ Not (Answer the last question)

20

**Do you know if there are clinical criteria to diagnose MIH? \***☐ Yes, and I know how to implement them.☐ Yes, but I do not know how to implement them.☐ No

21

**What is the most frequent type/ defect seen in your practice? \***

- ☐ White demarcated defects
- ☐ Yellow/ brown demarcations
- ☐ Post-eruptive breakdown
- ☐ None

22

**In your practice, have you ever treated a patient with MIH? \***

- ☐ Yes
- ☐ No

23

**How confident do you feel in managing MIH teeth? \***

- ☐ Very confident
- ☐ Confident
- ☐ Doubtful
- ☐ Unconfident

24

**In your practice do you encounter demarcated hypomineralized defects in permanent teeth other than FPM and Incisors ? (Multiple answers are possible) \***

- ☐ Premolars
- ☐ Second permanent molars
- ☐ Canines
- ☐ None



25

**How frequently do you notice demarcated hypomineralized lesions in the second deciduous molars compared to the first permanent molars? (one answer is possible) \***

- ☐ More often
- ☐ Rarely
- ☐ Just as common as with the first permanent molar
- ☐ Never seen

26

**Do you feel the incidence has increased in the period of your practice? \***

- ☐ yes
- ☐ No

27

**Would you refer a child who has signs of MIH to a paediatric dental specialist for treatment? \***

- ☐ Yes or when possible
- ☐ No

28

**Do you think MIH represents a clinical problem that could come next to dental caries in public health? \* \***

- ☐ Yes
- ☐ No

29

**What type of preventive treatment do you often use to treat these teeth?** (Multiple answers are possible). \*

- ☐ Fluoride varnish
- ☐ Silver diamine fluoride solution
- ☐ Tooth mousse
- ☐ Fissure sealant

30

**Which material do you use MOST in treating MIH molars?**(multiple answers are possible).\* \*

- ☐ Microabrasion
- ☐ Resin infiltration
- ☐ Glass ionomer
- ☐ Composite
- ☐ Amalgam
- ☐ Preformed crowns
- ☐ Extraction

31

**Which of the following factors would influence your choice of restorative materials?**(multiple answers are possible) \*

- ☐ Adhesion
- ☐ Aesthetics
- ☐ Patient/parent preference
- ☐ Durability
- ☐ Remineralization potential
- ☐ Hypersensitivity
- ☐ Personal experience
- ☐ Research results

32

**Would you like further training regarding tooth hypomineralization?** (Multiple answers are possible). \*

- ☐ Diagnosis
- ☐ Aetiology
- ☐ Treatment
- ☐ No training

---

This content is neither created nor endorsed by Microsoft. The data you submit will be sent to the form owner.

 Microsoft Forms
