# Supplementary material for: Familiarity and Knowledge regarding Molar Incisor Hypomineralization amongst a group of Egyptian Dentists and Dental Students
Source: Research Square preprint supplement (doi:10.21203/rs.3.rs-7565506/v1), 2025-09-26
Supplement: Supplementary file 2 [file d076b2e1b86d0bdf149f5b97.pdf]

## Questionnaires regarding Molar Incisor Hypomineralization(MIH)

*Your honest answers about (MIH) are highly appreciated as we will base our analysis on them.*

\* Required

### Participant Profile:

1

**Gender: \***

☐ male

☐ female

**Awareness, Knowledge and perception**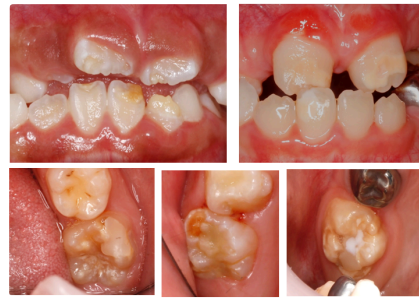

2

**Are you familiar with MIH? \***☐ Yes☐ No

3

If yes, How did you learn about it? (Multiple answers are possible).☐ Dental journals☐ Lecture notes☐ Brochures or pamphlets☐ Internet☐ Books(printed or electronic)☐ Dental clinic/clinical courses☐ Other (please specify):-----

4

**Have you been aware that MIH is a developmental defect that differs from fluorosis and hypoplasia? \***☐ Yes☐ No

5

**In your best judgement, how prevalent is MIH in your community?** (One answer is possible).

\*

- ☐ <5 %
- ☐ 5-10%
- ☐ >20 %
- ☐ Not sure

6

**Which factors do you think are involved in the etiology of MIH?** (Multiple answers are possible).

\*

- ☐ Genetic factors
- ☐ Environmental contaminants
- ☐ Acute medical conditions affecting the mother or her child.
- ☐ Chronic medical conditions affecting the mother or her child.
- ☐ Antibiotics or medications
- ☐ Fluoride exposure

7

**When do you think this insult has happened?**

\*

- ☐ During pregnancy
- ☐ 1st year of life
- ☐ 3rd year of life
- ☐ Pregnancy to 1st year of life
- ☐ Pregnancy to 3rd year of life

8

**Do you think that the pattern of caries related to MIH is different from the classical caries pattern? \***

- ☐ Yes
- ☐ No
- ☐ Not sure

## Perception, clinical experience, continuing education

9

**Do you know if there are clinical criteria to diagnose MIH? \***

- ☐ Yes, and I know how to implement them.
- ☐ Yes, but I do not know how to implement them.
- ☐ No

10

**As a clinician, do you feel prepared enough to diagnose a patient with MIH? \***

- ☐ Yes, in the initial and advanced stages.
- ☐ Yes, only in the initial stages.
- ☐ Not (continue with the last question)

11

**How confident do you feel when diagnosing a patient with MIH? Choose one option. \***

- ☐ Very confident
- ☐ Confident
- ☐ Slightly confident
- ☐ Not confident at all

12

**What is the most frequent type/defect seen in the clinic? \***

- ☐ White demarked
- ☐ Yellow /brown demarcations
- ☐ Post-eruptive breakdown
- ☐ None

13

**How often do you notice MIH affected teeth in the clinic?(chose one option) \***

- ☐ Weekly basis
- ☐ Monthly basis
- ☐ Yearly basis

14

**In your practice in dental school. Have you ever treated a patient with MIH? \***

- ☐ Yes
- ☐ No

15

**Which of the following factors would influence your choice of restorative materials?(multiple answers possible) \***

- ☐ Adhesion
- ☐ Aesthetics
- ☐ Patient/parent preference
- ☐ Durability
- ☐ Remineralization potential
- ☐ Hypersensitivity
- ☐ Personal experience
- ☐ Research results

16

**Which material do you use MOST in treating MIH molars?(multiple answers are possible). \***

- ☐ Amalgam
- ☐ Composite
- ☐ Flowable composite
- ☐ Resin-modified glass ionomer
- ☐ Compomer
- ☐ Preformed steel crowns
- ☐ Other (please specify.....)

17

**Do you think MIH is a clinically relevant problem? \***

- ☐ Yes
- ☐ No

18

**If Yes , In Which of the following aspects do you encounter difficulties? (Multiple answers are possible).**

- ☐ Diagnosis
- ☐ Aesthetics
- ☐ Achieving adequate local anesthesia
- ☐ Determination of the restoration margins of the affected enamel
- ☐ Provision of adequate restorations
- ☐ Long-term success of restorations
- ☐ Achieving a result that feels good to the patient and allows normal function as well as good oral hygiene

19

**Would you suggest including clinical training regarding MIH in your dental course? \***

☐ Yes

☐ No

20

**If yes ,which area(s) do you suggest to be taught more about ? (Multiple answers are possible )**

☐ Diagnosis

☐ Etiology

☐ Treatment

☐ Other(please specify):.....

---

This content is neither created nor endorsed by Microsoft. The data you submit will be sent to the form owner.

 Microsoft Forms
